# Supplementary material for: Photoluminescence and electroluminescence of cationic PtAu2 heterotrinuclear complexes with aromatic acetylides
Source: Royal Society of Chemistry journal article supplement (doi:10.1039/c6dt04249j), 2016-12-12
Supplement: c6dt04249j1.pdf [file c6dt04249j1.pdf]

# Electronic Supporting Information

## Photoluminescence and Electroluminescence of Cationic PtAu<sub>2</sub> Heterotrinary Complexes with Aromatic Acetylides

Li-Yi Zhang, Liang-Jin Xu,\* Jin-Yun Wang, Xian-Chong Zeng, Zhong-Ning Chen\*

*State Key Laboratory of Structural Chemistry, Fujian Institute of Research on the Structure of Matter,  
Chinese Academy of Sciences, Fuzhou, Fujian 350002, China*

**Table S1.** The Partial Molecular Orbital Compositions (%) in the Ground State and the Absorption Transitions for PtAu<sub>2</sub> Complex **1** in CH<sub>2</sub>Cl<sub>2</sub> Calculated by TD-DFT Method at the PBE1PBE Level.

| orbital | energy/eV | MO contribution /% |                  |       |                                  |
|---------|-----------|--------------------|------------------|-------|----------------------------------|
|         |           | Pt (s/p/d)         | Au (s/p/d)       | dpmp  | C≡CC <sub>6</sub> H <sub>5</sub> |
| LUMO+13 | -0.98     | 2.14 (0/100/0)     | 16.09 (10/76/14) | 72.38 | 9.40                             |
| LUMO+10 | -1.18     | 13.55 (0/100/0)    | 20.57 (48/39/13) | 61.03 | 4.86                             |
| LUMO+4  | -1.57     | 3.58 (60/0/40)     | 10.48 (27/67/6)  | 83.29 | 2.65                             |
| LUMO+3  | -1.63     | 3.92 (0/100/0)     | 9.33 (32/50/18)  | 81.56 | 5.19                             |
| LUMO+2  | -1.69     | 3.45 (0/100/0)     | 12.87 (43/32/25) | 82.58 | 1.10                             |
| LUMO    | -2.54     | 12.10 (0/100/0)    | 19.31 (47/41/12) | 58.67 | 9.92                             |
| HOMO    | -6.34     | 22.97 (3/0/97)     | 3.31 (45/9/46)   | 3.49  | 70.23                            |
| HOMO-1  | -6.79     | 34.65 (27/0/73)    | 38.49 (34/11/55) | 25.92 | 0.94                             |
| HOMO-2  | -6.81     | 1.08 (0/100/0)     | 16.91 (43/8/50)  | 12.76 | 69.25                            |

| state           | <i>E</i> /nm (eV) | O.S.   | transition    | contrib. | assignment                                            | exp./nm |
|-----------------|-------------------|--------|---------------|----------|-------------------------------------------------------|---------|
| S <sub>1</sub>  | 410 (3.03)        | 0.3188 | HOMO→LUMO     | 98%      | <sup>1</sup> LLCT/ <sup>1</sup> MC/ <sup>1</sup> IL   | 432     |
| S <sub>2</sub>  | 363 (3.42)        | 0.6303 | HOMO-1→LUMO   | 98%      | <sup>1</sup> MLCT/ <sup>1</sup> MC/ <sup>1</sup> IL   | 382     |
| S <sub>6</sub>  | 309 (4.01)        | 0.0754 | HOMO→LUMO+2   | 57%      | <sup>1</sup> LLCT/ <sup>1</sup> MC/ <sup>1</sup> MLCT |         |
|                 |                   |        | HOMO→LUMO+3   | 35%      | <sup>1</sup> LLCT/ <sup>1</sup> MC/ <sup>1</sup> MLCT |         |
| S <sub>9</sub>  | 304 (4.08)        | 0.0872 | HOMO→LUMO+3   | 57%      | <sup>1</sup> LLCT/ <sup>1</sup> MC/ <sup>1</sup> MLCT |         |
|                 |                   |        | HOMO→LUMO+2   | 37%      | <sup>1</sup> LLCT/ <sup>1</sup> MC/ <sup>1</sup> MLCT |         |
| S <sub>27</sub> | 271 (4.58)        | 0.1361 | HOMO→LUMO+10  | 69%      | <sup>1</sup> LLCT/ <sup>1</sup> MC                    | 267     |
|                 |                   |        | HOMO-2→LUMO+4 | 17%      | <sup>1</sup> LLCT/ <sup>1</sup> MC/ <sup>1</sup> IL   |         |
| S <sub>46</sub> | 259 (4.78)        | 0.1315 | HOMO→LUMO+13  | 75%      | <sup>1</sup> LLCT/ <sup>1</sup> MC                    |         |

**Table S2.** Partial Molecular Orbital Compositions (%) in the Lowest Triplet State and the Emission Transitions for PtAu<sub>2</sub> Complex **1** in CH<sub>2</sub>Cl<sub>2</sub> Calculated by TD-DFT Method at the PBE1PBE Level.

| orbital | energy/eV | MO contribution /% |                  |       |                                  |
|---------|-----------|--------------------|------------------|-------|----------------------------------|
|         |           | Pt (s/p/d)         | Au (s/p/d)       | dpmp  | C≡CC <sub>6</sub> H <sub>5</sub> |
| LUMO    | -2.69     | 13.76 (0/100/0)    | 20.65 (55/32/13) | 54.73 | 10.87                            |
| HOMO    | -6.15     | 22.57 (2/0/98)     | 2.98 (41/11/47)  | 3.36  | 71.09                            |

  

| state          | <i>E</i> /nm (eV) | O.S.   | transition | contrib. | assignment                         | exp./nm |
|----------------|-------------------|--------|------------|----------|------------------------------------|---------|
| T <sub>1</sub> | 511 (2.43)        | 0.0000 | HOMO→LUMO  | 83%      | <sup>3</sup> LLCT/ <sup>3</sup> MC | 494     |

**Table S3.** The Partial Molecular Orbital Compositions (%) in the Ground State and the Absorption Transitions for PtAu<sub>2</sub> Complex **2** in CH<sub>2</sub>Cl<sub>2</sub> Calculated by TD-DFT Method at the PBE1PBE Level.

| orbital | energy/eV | MO contribution /% |                  |       |                                       |
|---------|-----------|--------------------|------------------|-------|---------------------------------------|
|         |           | Pt (s/p/d)         | Au (s/p/d)       | dpmp  | C≡CC <sub>6</sub> H <sub>4</sub> Bu-4 |
| LUMO+14 | -0.92     | 7.64 (0/100/0)     | 19.19 (44/51/5)  | 61.56 | 11.60                                 |
| LUMO+6  | -1.39     | 9.72 (61/0/39)     | 6.47 (50/41/9)   | 79.91 | 3.90                                  |
| LUMO    | -2.51     | 14.92 (0/100/0)    | 24.07 (63/29/9)  | 53.00 | 8.01                                  |
| HOMO    | -6.24     | 23.13 (3/0/97)     | 1.42 (47/19/34)  | 3.18  | 72.27                                 |
| HOMO-1  | -6.65     | 33.91 (23/0/77)    | 39.11 (37/10/53) | 26.06 | 0.92                                  |
| HOMO-2  | -6.72     | 1.06 (0/100/0)     | 11.77 (51/6/42)  | 10.08 | 77.08                                 |

| states          | <i>E</i> /nm (eV) | O.S.   | transition    | contrib. | assignment                                          | exp. /nm |
|-----------------|-------------------|--------|---------------|----------|-----------------------------------------------------|----------|
| S <sub>1</sub>  | 414 (3.00)        | 0.4146 | HOMO→LUMO     | 98%      | <sup>1</sup> LLCT/ <sup>1</sup> MC                  | 438      |
| S <sub>2</sub>  | 371 (3.34)        | 0.6896 | HOMO-1→LUMO   | 98%      | <sup>1</sup> MC/ <sup>1</sup> MLCT/ <sup>1</sup> IL | 384      |
| S <sub>43</sub> | 262 (4.73)        | 0.2223 | HOMO→LUMO+14  | 56%      | <sup>1</sup> LLCT/ <sup>1</sup> MC/ <sup>1</sup> IL | 263      |
|                 |                   |        | HOMO-2→LUMO+6 | 11%      | <sup>1</sup> LLCT/ <sup>1</sup> MC/ <sup>1</sup> IL |          |

**Table S4.** Partial Molecular Orbital Compositions (%) in the Lowest Triplet State and the Emission Transitions for PtAu<sub>2</sub> Complex **2** in CH<sub>2</sub>Cl<sub>2</sub> Calculated by TD-DFT Method at the PBE1PBE Level.

| orbital | energy/eV | MO contribution (%) |                  |       |                                       |
|---------|-----------|---------------------|------------------|-------|---------------------------------------|
|         |           | Pt (s/p/d)          | Au (s/p/d)       | dpmp  | C≡CC <sub>6</sub> H <sub>4</sub> Bu-4 |
| LUMO    | -2.68     | 13.93 (0/100/0)     | 21.21 (56/32/12) | 54.27 | 10.58                                 |
| HOMO    | -6.03     | 20.45 (4/0/96)      | 2.76 (40/13/47)  | 3.08  | 73.71                                 |

  

| state          | <i>E</i> /nm (eV) | O.S.       | transition | contrib. | assignment                         | exp./nm |
|----------------|-------------------|------------|------------|----------|------------------------------------|---------|
| T <sub>1</sub> | 522 (2.38)        | 0.00<br>00 | HOMO→LUMO  | 85%      | <sup>3</sup> LLCT/ <sup>3</sup> MC | 502     |

**Table S5.** The Partial Molecular Orbital Compositions (%) in the Ground State and the Absorption Transitions for PtAu<sub>2</sub> Complex **3** in CH<sub>2</sub>Cl<sub>2</sub> Calculated by TD-DFT Method at the PBE1PBE Level.

| orbital | energy/eV | MO contribution /% |                  |       |         |
|---------|-----------|--------------------|------------------|-------|---------|
|         |           | Pt (s/p/d)         | Au (s/p/d)       | dpmp  | C≡C-OXD |
| LUMO+2  | -1.98     | 4.05 (0/100/0)     | 9.71 (58/35/8)   | 41.98 | 44.25   |
| LUMO+1  | -2.11     | 11.81 (76/0/24)    | 8.83 (61/37/2)   | 7.09  | 72.27   |
| LUMO    | -2.74     | 13.72 (0/100/0)    | 22.09 (61/29/10) | 43.14 | 21.05   |
| HOMO    | -6.37     | 17.54 (4/0/96)     | 1.25 (52/15/33)  | 2.33  | 78.88   |
| HOMO-1  | -6.68     | 0.58 (0/100/0)     | 5.72 (50/7/43)   | 5.02  | 88.68   |
| HOMO-2  | -6.74     | 33.41 (22/0/78)    | 39.37 (38/9/53)  | 26.23 | 0.98    |

| state          | <i>E</i> /nm (eV) | O.S. | transition  | contrib. | assignment                                                             | exp./nm |
|----------------|-------------------|------|-------------|----------|------------------------------------------------------------------------|---------|
| S <sub>1</sub> | 420 (2.95)        | 1.31 | HOMO→LUMO   | 95%      | <sup>1</sup> LLCT/ <sup>1</sup> MC/ <sup>1</sup> IL/ <sup>1</sup> LMCT | 439     |
| S <sub>2</sub> | 380 (3.26)        | 0.62 | HOMO-2→LUMO | 96%      | <sup>1</sup> MLCT/ <sup>1</sup> MC/ <sup>1</sup> IL                    | 390     |
| S <sub>6</sub> | 328 (3.78)        | 1.66 | HOMO→LUMO+  | 78%      | <sup>1</sup> IL/ <sup>1</sup> LLCT/ <sup>1</sup> MC                    | 329     |

**Table S6.** Partial Molecular Orbital Compositions (%) in the Lowest Triplet State and the Emission Transitions for PtAu<sub>2</sub> Complex **3** in CH<sub>2</sub>Cl<sub>2</sub> Calculated by TD-DFT Method at the PBE1PBE Level.

| orbital | energy/eV | MO contribution (%) |                  |       |         |
|---------|-----------|---------------------|------------------|-------|---------|
|         |           | Pt (s/p/d)          | Au (s/p/d)       | dpmp  | C≡C-OXD |
| LUMO+1  | -2.30     | 12.04 (50/31/19)    | 12.12 (65/30/4)  | 20.74 | 55.10   |
| LUMO    | -2.92     | 12.93 (2/97/1)      | 20.19 (62/27/11) | 36.76 | 30.11   |
| HOMO    | -6.11     | 11.58 (2/1/97)      | 1.92 (51/14/36)  | 2.69  | 83.82   |

| state          | <i>E</i> /nm (eV) | O.S.   | transition  | contrib. | assignment                                                             | exp./nm |
|----------------|-------------------|--------|-------------|----------|------------------------------------------------------------------------|---------|
| T <sub>1</sub> | 527 (2.35)        | 0.0000 | HOMO→LUMO   | 63%      | <sup>3</sup> LLCT/ <sup>3</sup> IL/ <sup>3</sup> LMCT/ <sup>3</sup> MC | 516     |
|                |                   |        | HOMO→LUMO+1 | 24%      | <sup>3</sup> IL/ <sup>3</sup> LLCT/ <sup>3</sup> LMCT/ <sup>3</sup> MC |         |

**Table S7.** The Partial Molecular Orbital Compositions (%) in the Ground State and the Absorption Transitions for PtAu<sub>2</sub> Complex **4** in CH<sub>2</sub>Cl<sub>2</sub> Calculated by TD-DFT Method at the PBE1PBE Level.

| orbital | energy/eV | MO contribution /% |                  |       |         |                |
|---------|-----------|--------------------|------------------|-------|---------|----------------|
|         |           | Pt (s/p/d)         | Au (s/p/d)       | dpmp  | C≡C-OXD | C≡C-3-Phcarb-9 |
| LUMO+1  | -2.01     | 6.66 (31/49/20)    | 9.85 (59/35/6)   | 29.59 | 53.19   | 0.71           |
| LUMO    | -2.60     | 14.67 (2/97/2)     | 23.25 (63/29/9)  | 46.05 | 12.62   | 3.40           |
| HOMO    | -5.88     | 9.21 (2/4/94)      | 1.91 (43/16/41)  | 3.14  | 4.77    | 80.96          |
| HOMO-1  | -6.48     | 8.18 (6/4/90)      | 2.03 (50/12/38)  | 3.14  | 51.43   | 35.21          |
| HOMO-2  | -6.59     | 1.46 (11/19/70)    | 3.55 (60/9/31)   | 3.95  | 26.53   | 64.51          |
| HOMO-3  | -6.67     | 33.80 (23/0/77)    | 39.21 (37/10/53) | 25.98 | 0.51    | 0.50           |

| states          | <i>E</i> /nm (eV) | O.S.   | transition    | contrib. | assignment                                                             | exp./nm |
|-----------------|-------------------|--------|---------------|----------|------------------------------------------------------------------------|---------|
| S <sub>1</sub>  | 458 (2.70)        | 0.5714 | HOMO→LUMO     | 94%      | <sup>1</sup> LLCT/ <sup>1</sup> LMCT/ <sup>1</sup> MC                  | 457     |
| S <sub>2</sub>  | 379 (3.27)        | 0.4005 | HOMO-1→LUMO   | 76%      | <sup>1</sup> LLCT/ <sup>1</sup> LMCT/ <sup>1</sup> IL/ <sup>1</sup> MC | 383     |
|                 |                   |        | HOMO-2→LUMO   | 14%      | <sup>1</sup> LLCT/ <sup>1</sup> LMCT/ <sup>1</sup> IL                  |         |
| S <sub>3</sub>  | 375 (3.30)        | 0.6848 | HOMO-3→LUMO   | 94%      | <sup>1</sup> MC/ <sup>1</sup> MLCT/ <sup>1</sup> IL                    |         |
| S <sub>12</sub> | 318 (3.90)        | 0.6006 | HOMO-1→LUMO+1 | 52%      | <sup>1</sup> IL/ <sup>1</sup> LLCT                                     | 303     |
|                 |                   |        | HOMO-2→LUMO+1 | 15%      | <sup>1</sup> IL/ <sup>1</sup> LLCT/ <sup>1</sup> LMCT                  |         |

**Table S8.** Partial Molecular Orbital Compositions (%) in the Lowest Triplet State and the Emission Transitions for PtAu<sub>2</sub> Complex **4** in CH<sub>2</sub>Cl<sub>2</sub> Calculated by TD-DFT Method at the PBE1PBE Level.

| orbital | energy/eV | MO contribution /% |                  |       |         |                |
|---------|-----------|--------------------|------------------|-------|---------|----------------|
|         |           | Pt (s/p/d)         | Au (s/p/d)       | dpmp  | C≡C-OXD | C≡C-3-Phcarb-9 |
| LUMO    | -2.78     | 15.82 (1/98/1)     | 24.99 (68/23/10) | 44.96 | 10.07   | 4.16           |
| HOMO    | -5.72     | 10.34 (1/4/95)     | 2.81 (49/16/35)  | 3.79  | 5.64    | 77.43          |

| state          | <i>E</i> /nm (eV) | O.S.   | transition | contrib. | assignment                                            | exp./nm |
|----------------|-------------------|--------|------------|----------|-------------------------------------------------------|---------|
| T <sub>1</sub> | 611 (2.03)        | 0.0000 | HOMO→LUMO  | 77%      | <sup>3</sup> LLCT/ <sup>3</sup> LMCT/ <sup>3</sup> MC | 570     |

**Table S9.** The Partial Molecular Orbital Compositions (%) in the Ground State and the Absorption Transitions for PtAu<sub>2</sub> Complex **5** in CH<sub>2</sub>Cl<sub>2</sub> Calculated by TD-DFT Method at the PBE1PBE Level.

| orbital | Energy/eV | MO contribution /% |                  |       |                |
|---------|-----------|--------------------|------------------|-------|----------------|
|         |           | Pt (s/p/d)         | Au (s/p/d)       | dpmp  | C≡C-3-Phcarb-9 |
| LUMO+26 | -0.44     | 3.31 (0/100/0)     | 22.90 (81/17/2)  | 43.90 | 29.89          |
| LUMO+17 | -0.86     | 19.73 (95/0/5)     | 10.17 (41/53/6)  | 69.16 | 0.94           |
| LUMO    | -2.45     | 13.96 (0/100/0)    | 22.66 (60/31/9)  | 55.91 | 7.47           |
| HOMO    | -5.72     | 12.52 (3/0/97)     | 1.51 (56/13/30)  | 2.67  | 83.29          |
| HOMO-1  | -6.00     | 0.59 (0/100/0)     | 4.39 (47/12/41)  | 5.23  | 89.79          |
| HOMO-4  | -6.62     | 33.74 (23/0/77)    | 39.19 (36/11/53) | 26.08 | 0.99           |

| state           | <i>E</i> /nm (eV) | O.S.   | transition                     | contrib.   | assignment                                                                                                     | exp./nm |
|-----------------|-------------------|--------|--------------------------------|------------|----------------------------------------------------------------------------------------------------------------|---------|
| S <sub>1</sub>  | 470 (2.64)        | 0.4896 | HOMO→LUMO                      | 97%        | <sup>1</sup> LLCT/ <sup>1</sup> LMCT/ <sup>1</sup> MC                                                          | 473     |
| S <sub>3</sub>  | 369 (3.36)        | 0.6872 | HOMO-4→LUMO                    | 97%        | <sup>1</sup> MC/ <sup>1</sup> MLCT/ <sup>1</sup> IL                                                            | 380     |
| S <sub>77</sub> | 265 (4.69)        | 0.5901 | HOMO-1→LUMO+17<br>HOMO→LUMO+26 | 22%<br>15% | <sup>1</sup> LLCT/ <sup>1</sup> LMCT<br><sup>1</sup> IL/ <sup>1</sup> LLCT/ <sup>1</sup> MC/ <sup>1</sup> LMCT | 288     |

**Table S10.** Partial Molecular Orbital Compositions (%) in the Lowest Triplet State and the Emission Transitions for PtAu<sub>2</sub> Complex **5** in CH<sub>2</sub>Cl<sub>2</sub> Calculated by TD-DFT Method at the PBE1PBE Level.

| orbital | energy/eV | MO contribution /% |                  |       |                |
|---------|-----------|--------------------|------------------|-------|----------------|
|         |           | Pt (s/p/d)         | Au (s/p/d)       | dpmp  | C≡C-3-Phcarb-9 |
| LUMO    | -2.64     | 15.69 (0/100/0)    | 25.31 (67/23/10) | 51.41 | 7.58           |
| HOMO    | -5.60     | 13.20 (1/0/99)     | 1.99 (63/13/24)  | 2.76  | 82.05          |

| state          | <i>E</i> /nm (eV) | O.S.   | transition | contrib. | assignment                                            | exp./nm |
|----------------|-------------------|--------|------------|----------|-------------------------------------------------------|---------|
| T <sub>1</sub> | 605 (2.05)        | 0.0000 | HOMO→LUMO  | 88%      | <sup>3</sup> LLCT/ <sup>3</sup> LMCT/ <sup>3</sup> MC | 558     |

**Table S11.** The energy levels and gaps for PtAu<sub>2</sub> complexes **1–5**, deduced from electrochemical studies and UV-Vis absorption spectra.

| complex  | $\Delta E_g^a$ /eV | HOMO <sup>b</sup> /eV | LUMO <sup>c</sup> /eV |
|----------|--------------------|-----------------------|-----------------------|
| <b>1</b> | 2.66               | 5.49                  | 2.83                  |
| <b>2</b> | 2.64               | 5.61                  | 2.97                  |
| <b>3</b> | 2.62               | 5.63                  | 3.01                  |
| <b>4</b> | 2.49               | 5.51                  | 3.02                  |
| <b>5</b> | 2.42               | 5.41                  | 2.99                  |

<sup>a</sup> Estimated from the onset wavelengths of the absorption spectra in CH<sub>2</sub>Cl<sub>2</sub>.

<sup>b</sup> Calculated from the oxidation potentials of cyclic voltammetry.

<sup>c</sup> Calculated from the HOMO energy levels and  $\Delta E_g$ .

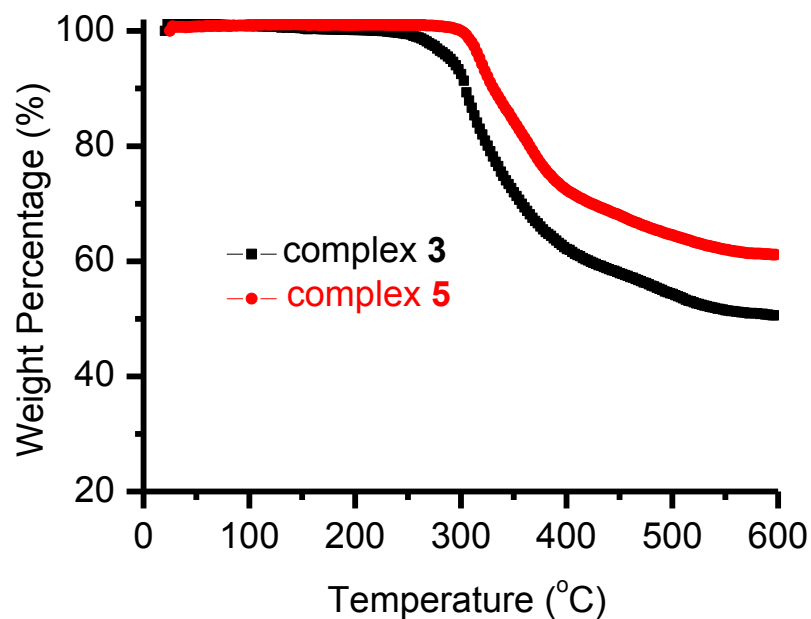

**Fig. S1.** Plots of thermogravimetric analysis for complexes **3** and **5** at temperature range 25–600 °C.

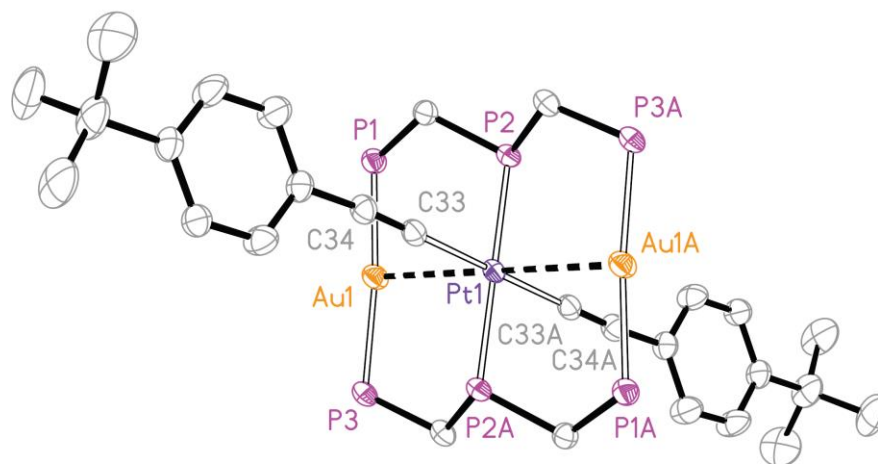

**Fig. S2.** A perspective drawing (30% thermal ellipsoids) of complex **2**. Phenyl rings on the phosphorus atoms are omitted for clarity.

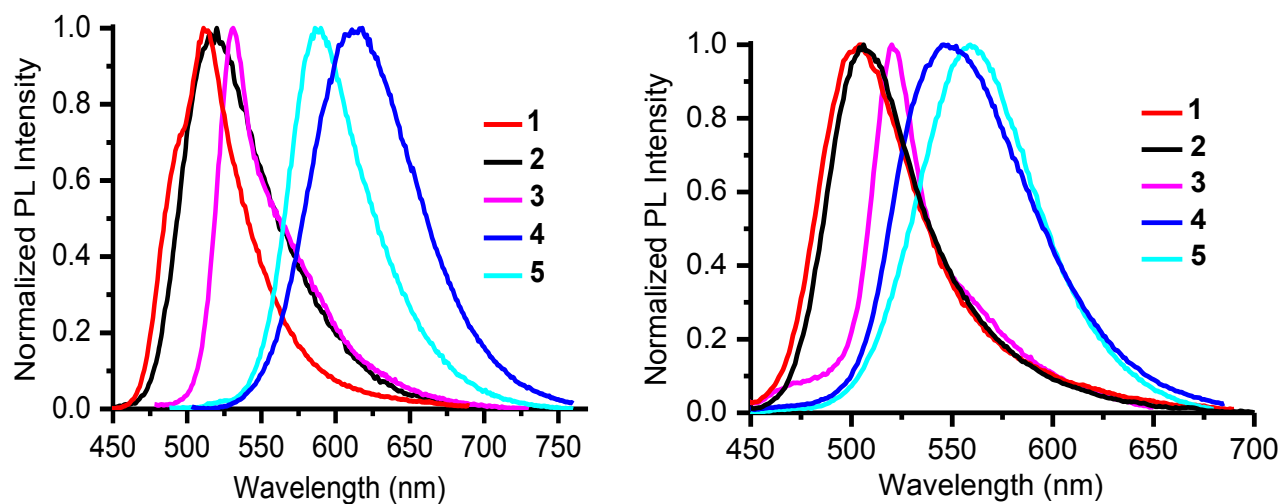

**Fig. S3.** The emission spectra of complexes **1–5** in solid state (left) and doping film (right) with mixed host (61% TCTA : 31% OXD-7) at ambient temperature.



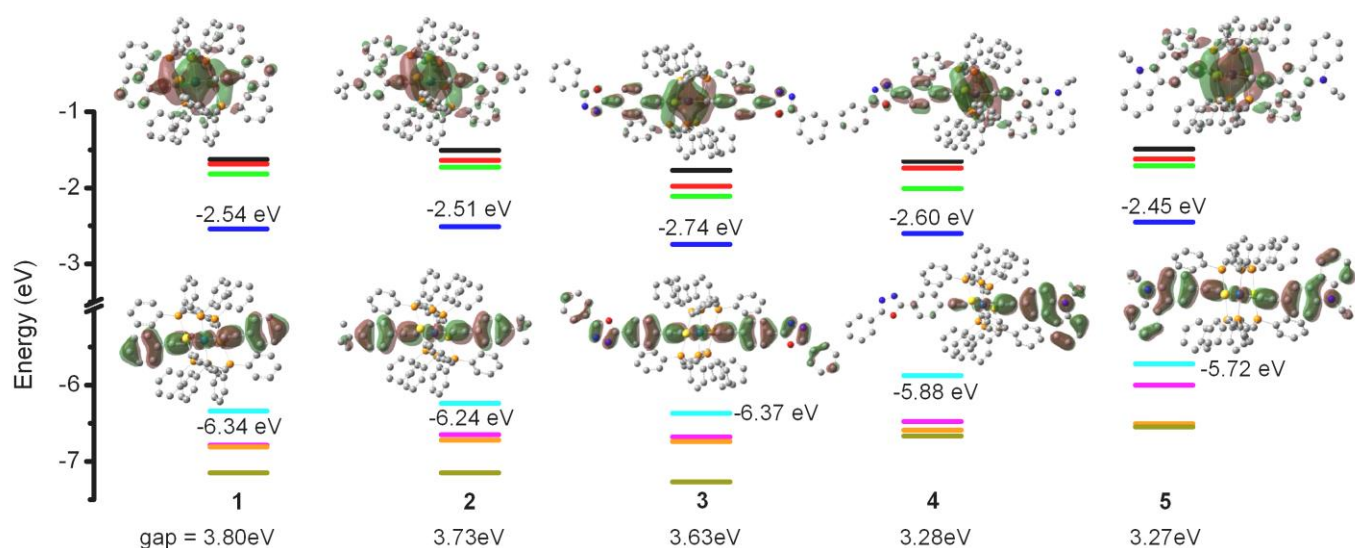

**Fig. S4.** Plots of the HOMO and LUMO and their energy level for complexes **1–5** in the ground state in dichloromethane by TD-DFT method at the PBE1PBE level (isovalue = 0.02).

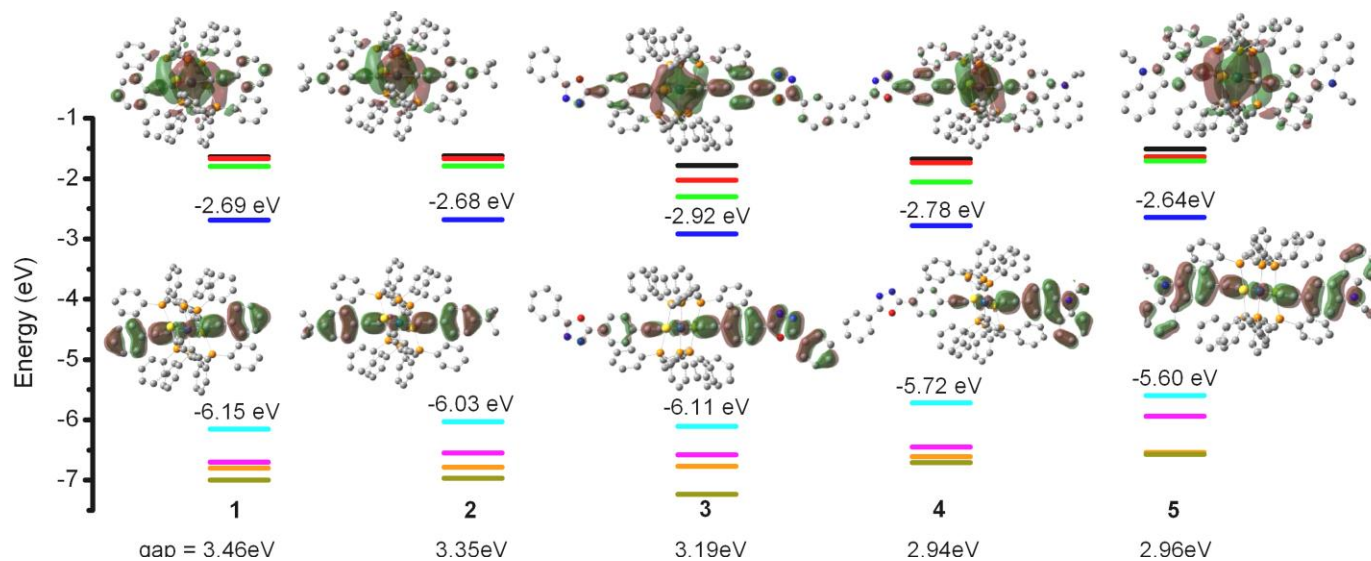

**Fig. S5.** Plots of the HOMO and LUMO and their energy level for complexes **1–5** in the lowest triplet state in dichloromethane by TD-DFT method at the PBE1PBE level (isovalue = 0.02).

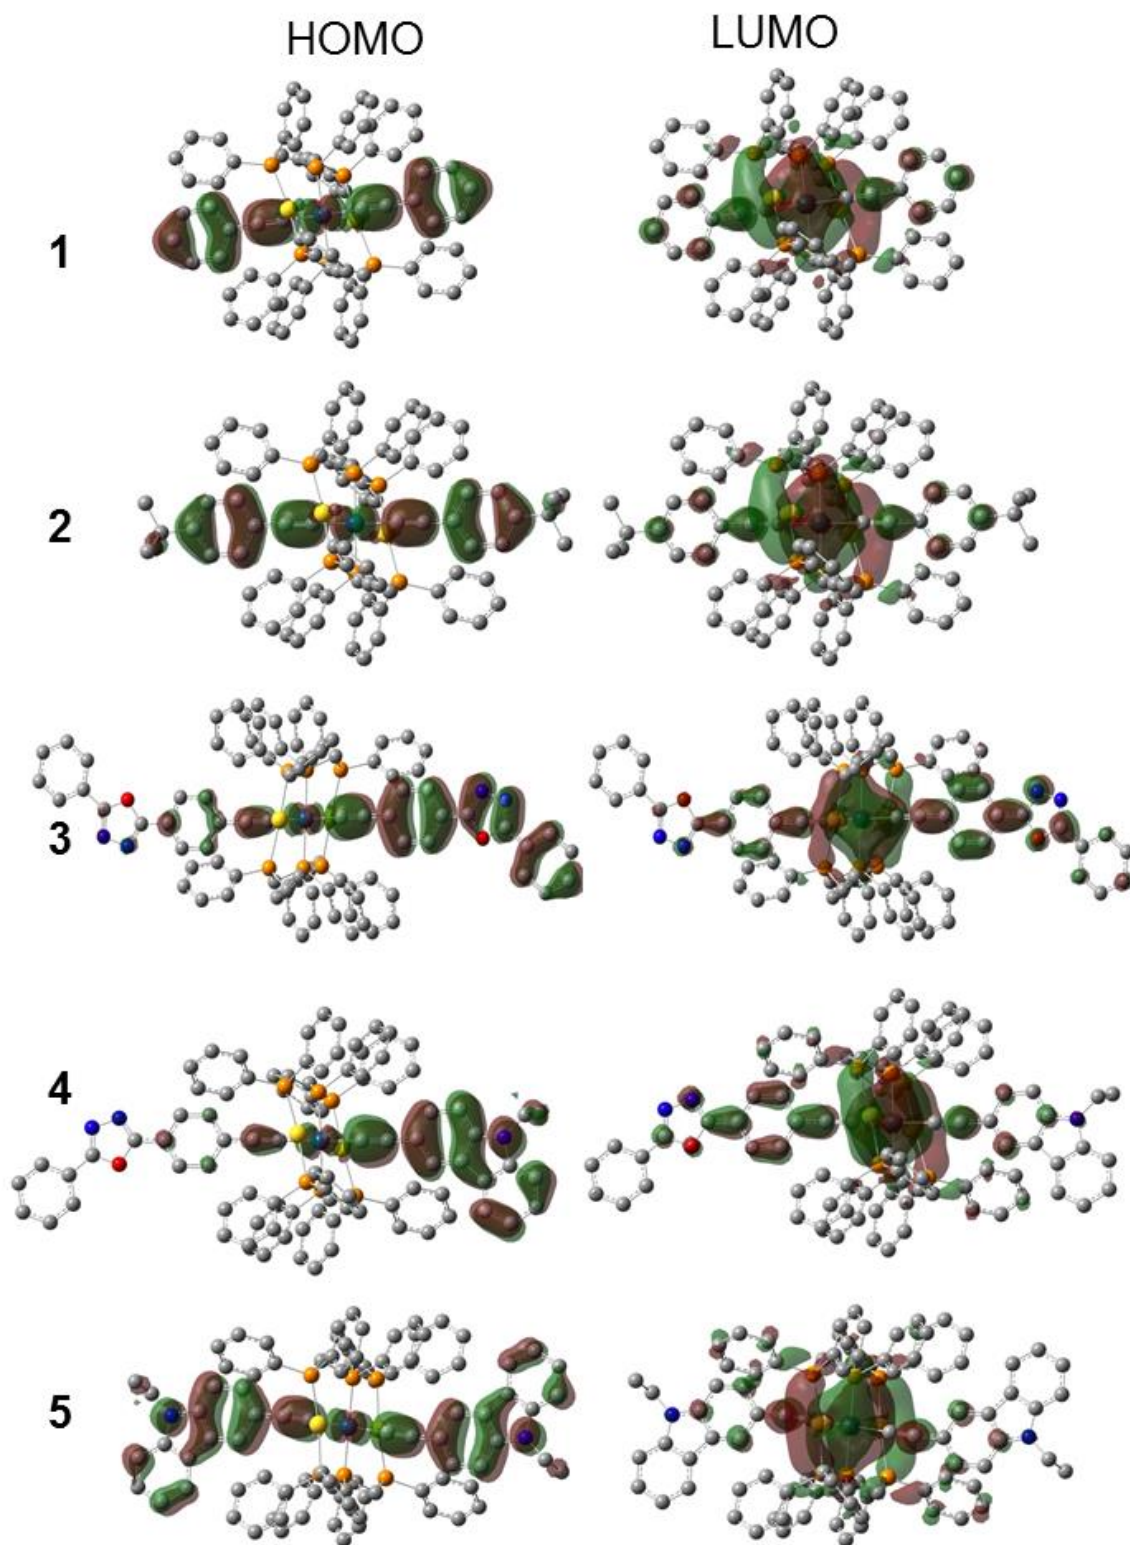

**Fig. S6.** Plots of the HOMO and LUMO involved in emission transition of complexes 1–5 in dichloromethane, calculated by TD-DFT method at the PBE1PBE level (isovalue = 0.02).

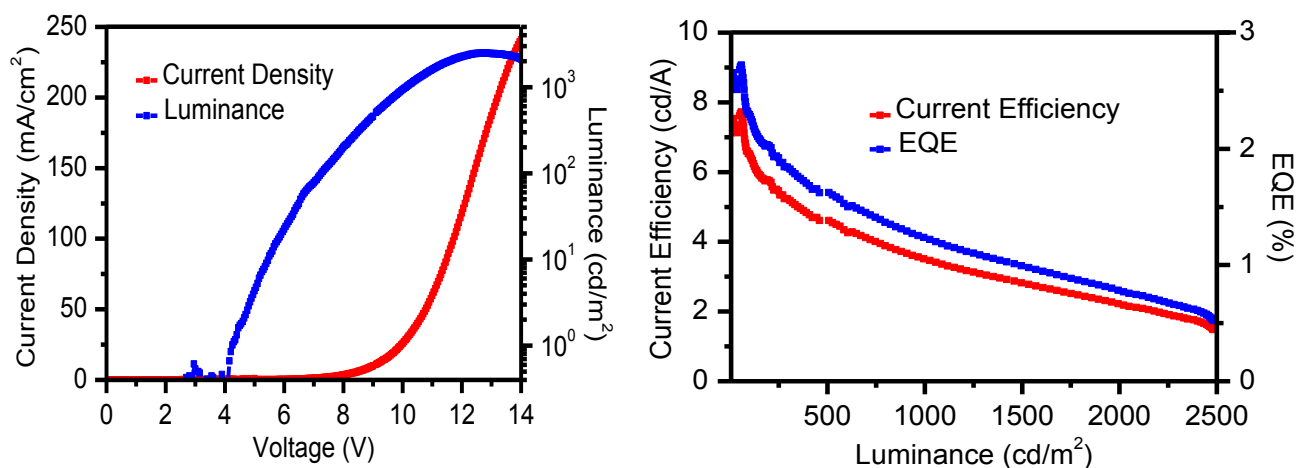

**Fig. S7.** (a) Current density-voltage-luminance characteristics. (b) Current efficiency/external quantum efficiency vs luminance for complex **1**.

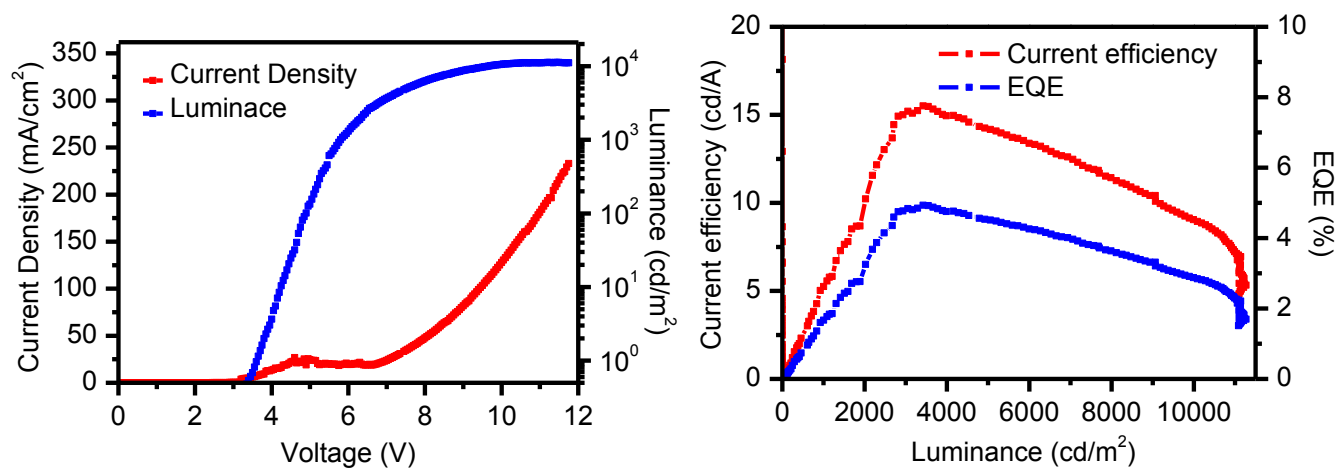

**Fig. S8.** (a) Current density-voltage-luminance characteristics. (b) Current efficiency/external quantum efficiency vs luminance for complex **2**.

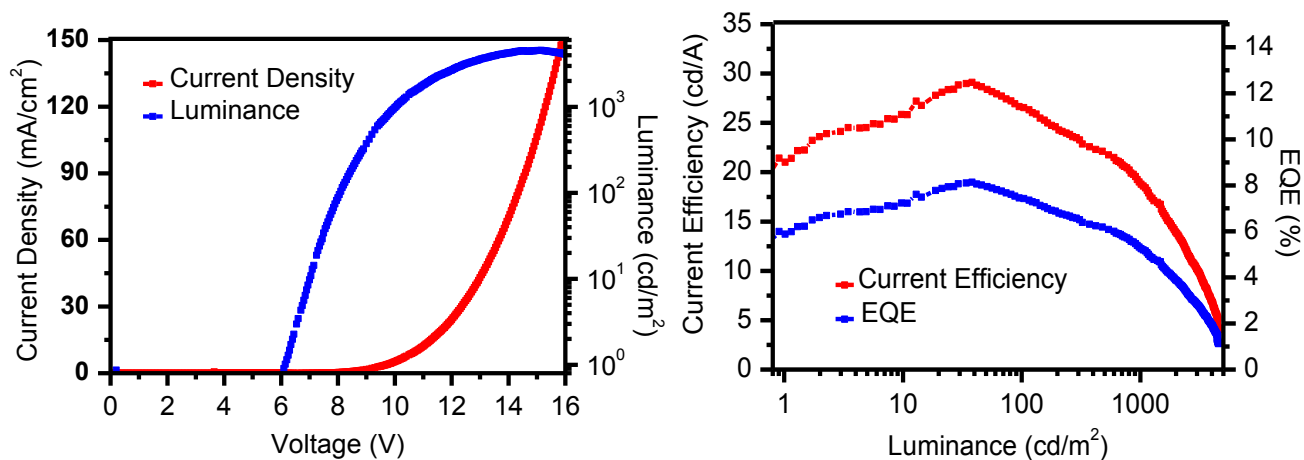

**Fig. S9.** (a) Current density-voltage-luminance characteristics. (b) Current efficiency/external quantum efficiency vs luminance for complex **3**

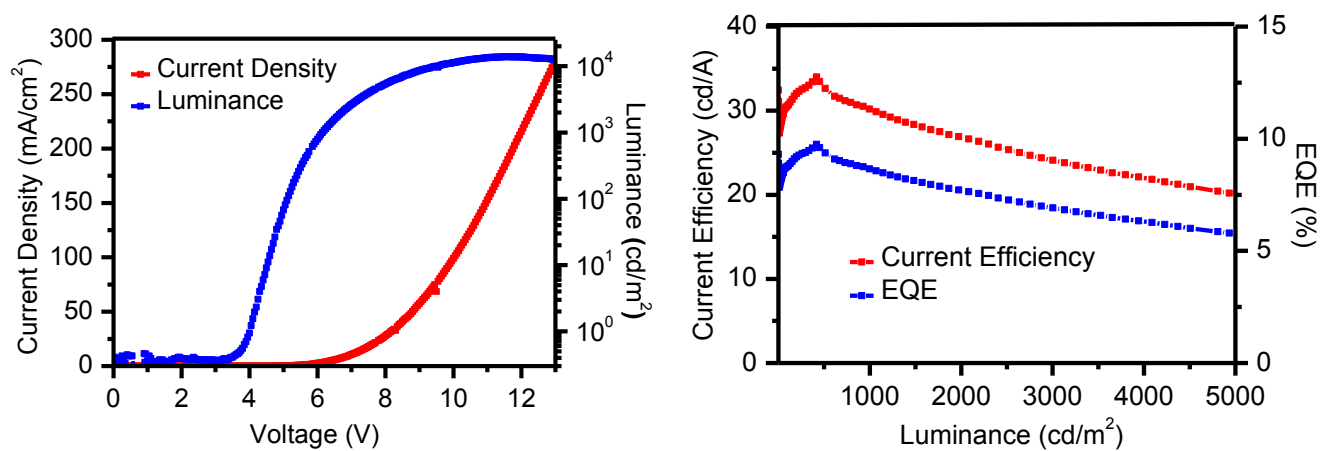

**Fig. S10.** (a) Current density-voltage-luminance characteristics. (b) Current efficiency/external quantum efficiency vs luminance for complex **4**.
